# Supplementary material for: Canopy position has a profound effect on soybean seed composition
Source: PubMed Central journal article supplement (PMC5028787; doi:10.7717/peerj.2452), 2016-09-13
Supplement: peerj-04-2452-s001.pdf [file peerj-04-2452-s001.pdf]

# SampleWeight

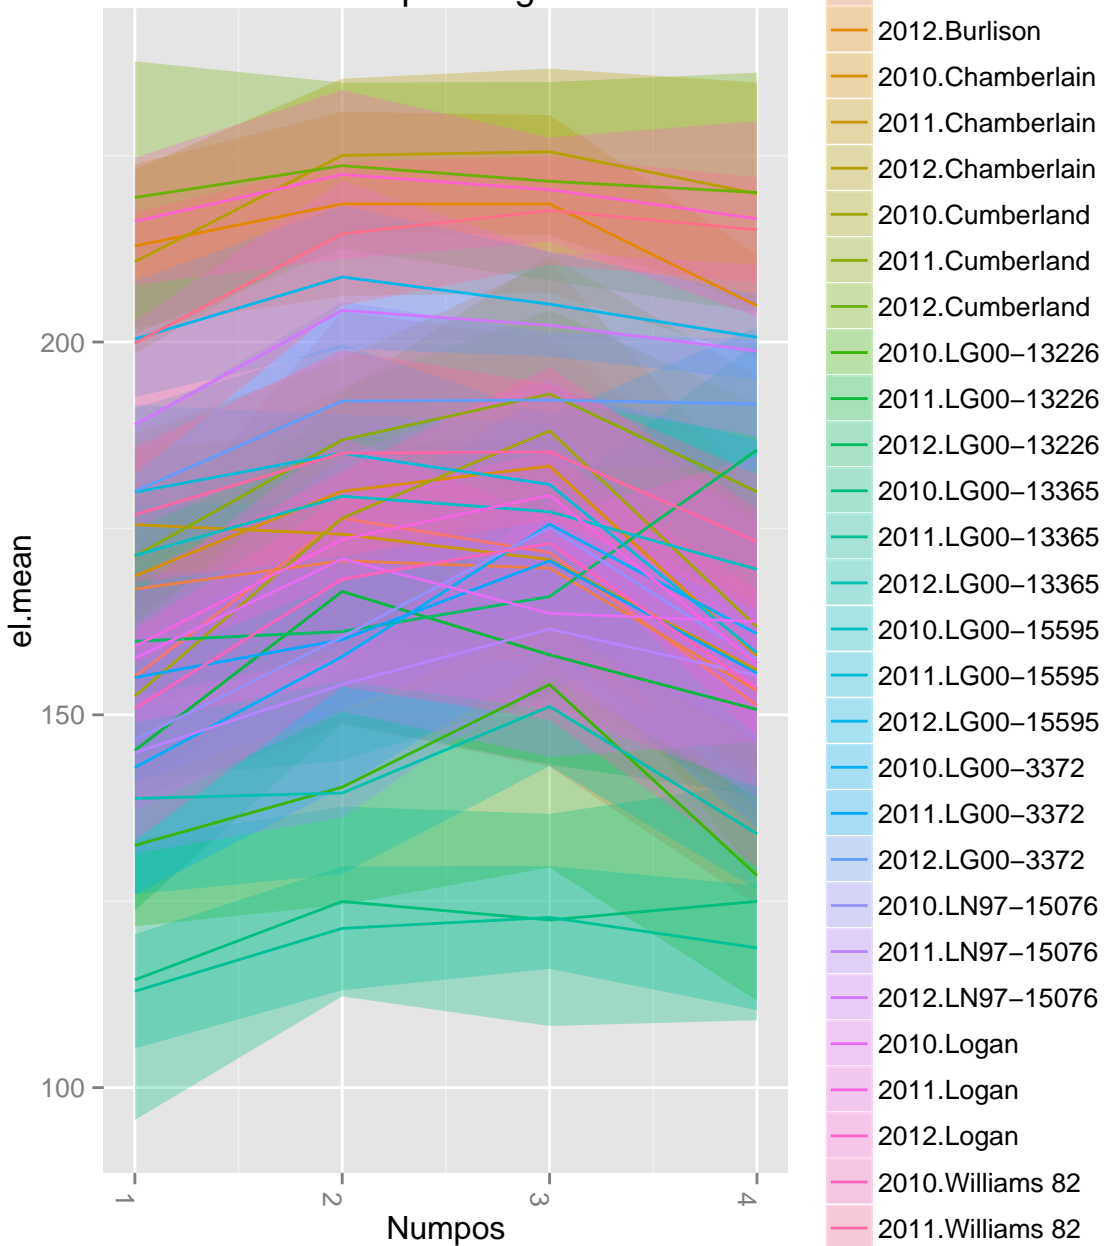

Na

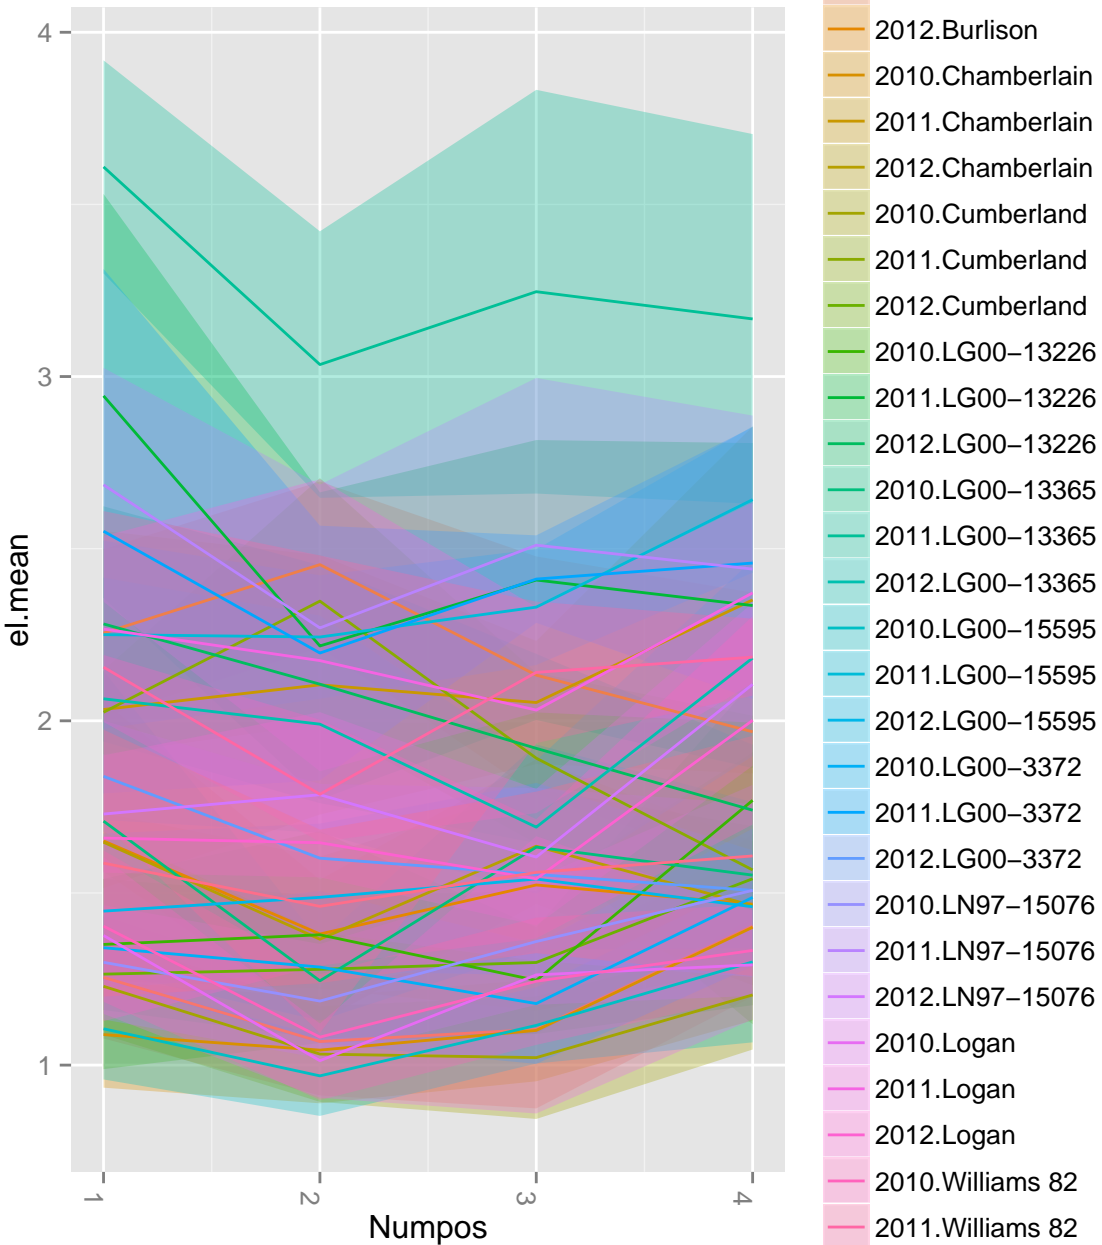

Mg

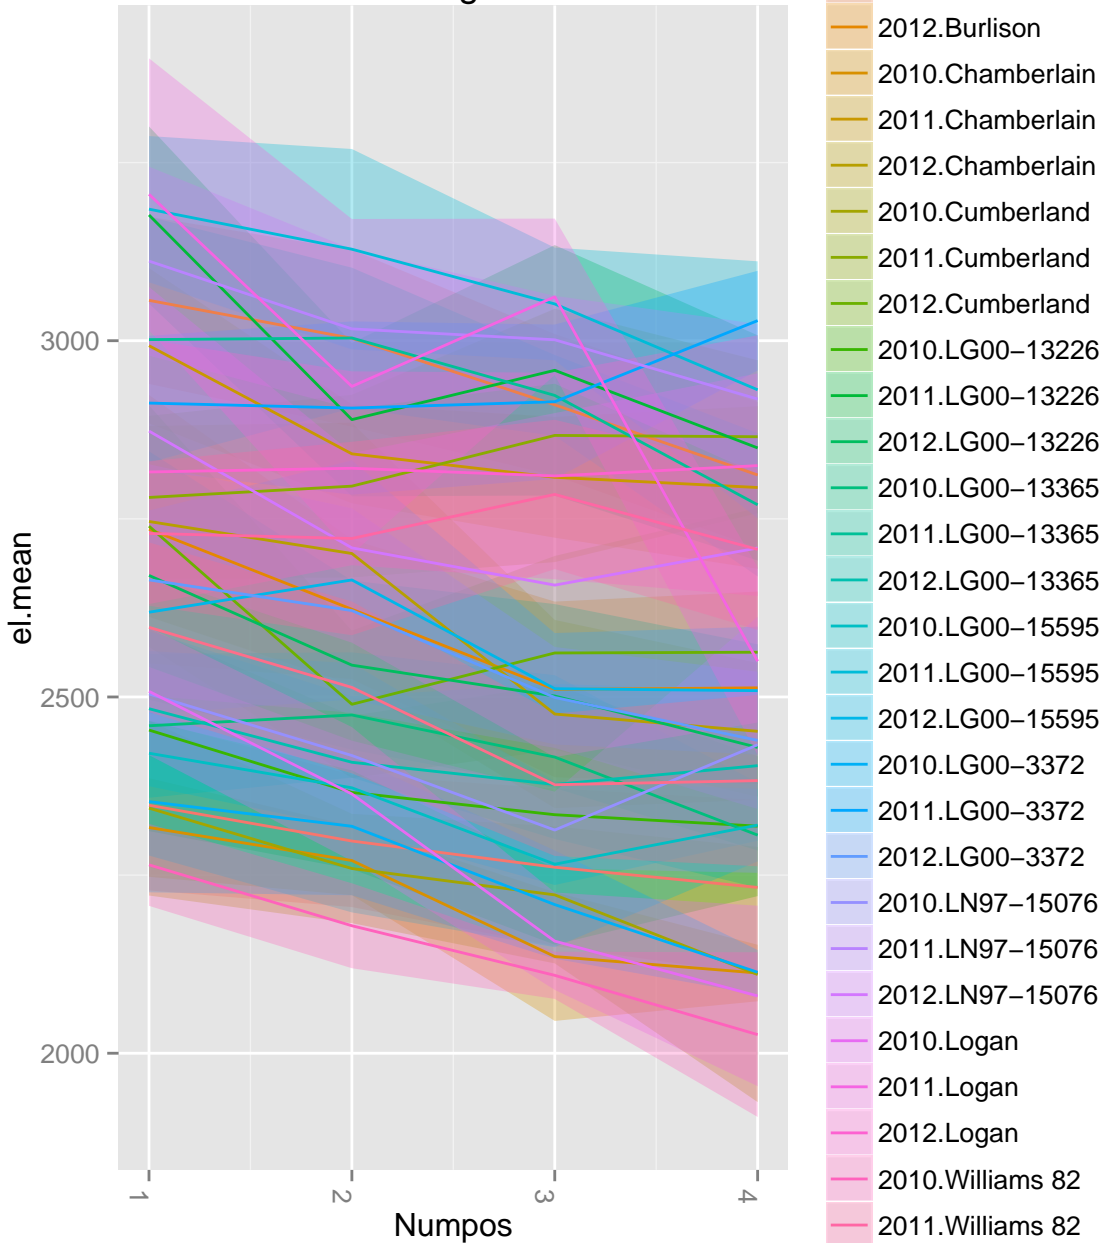

P

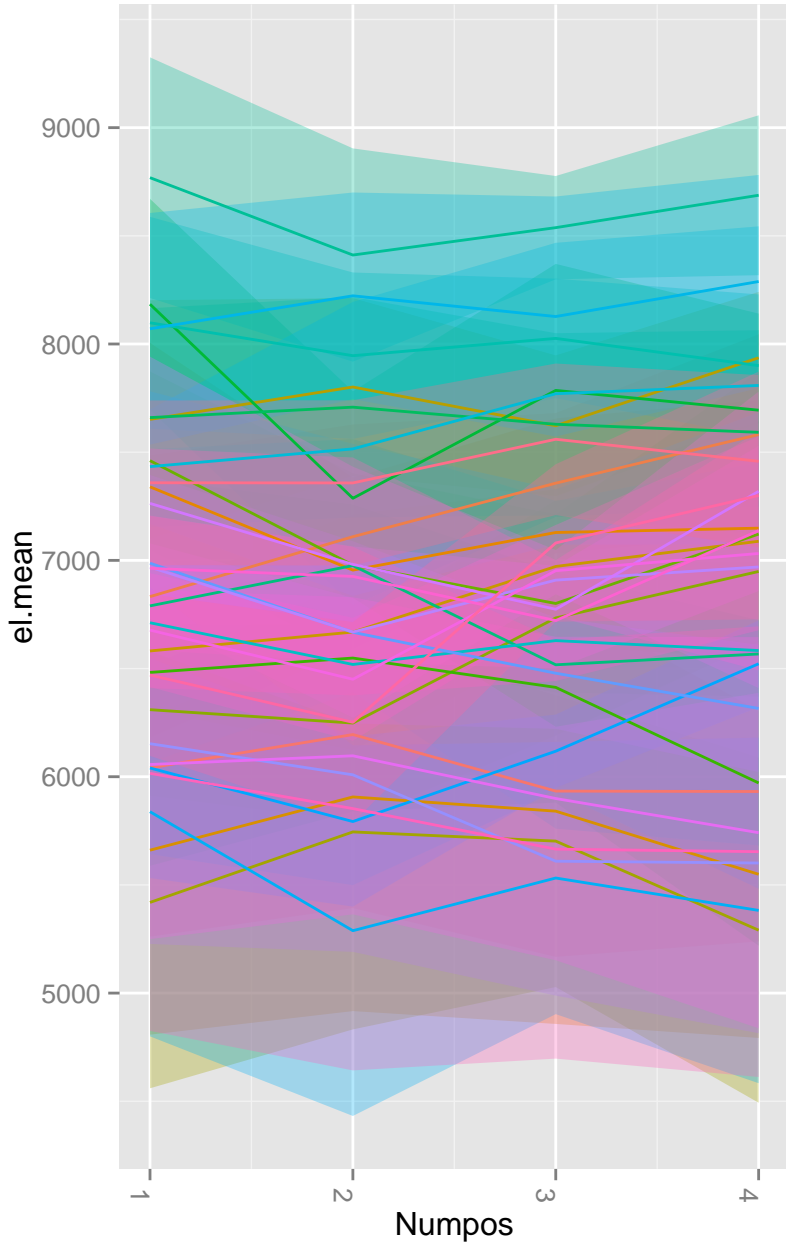

- 2010.Burlison
- 2011.Burlison
- 2012.Burlison
- 2010.Chamberlain
- 2011.Chamberlain
- 2012.Chamberlain
- 2010.Cumberland
- 2011.Cumberland
- 2012.Cumberland
- 2010.LG00-13226
- 2011.LG00-13226
- 2012.LG00-13226
- 2010.LG00-13365
- 2011.LG00-13365
- 2012.LG00-13365
- 2010.LG00-15595
- 2011.LG00-15595
- 2012.LG00-15595
- 2010.LG00-3372
- 2011.LG00-3372
- 2012.LG00-3372
- 2010.LN97-15076
- 2011.LN97-15076
- 2012.LN97-15076
- 2010.Logan
- 2011.Logan
- 2012.Logan
- 2010.Williams 82
- 2011.Williams 82
- 2012.Williams 82

S

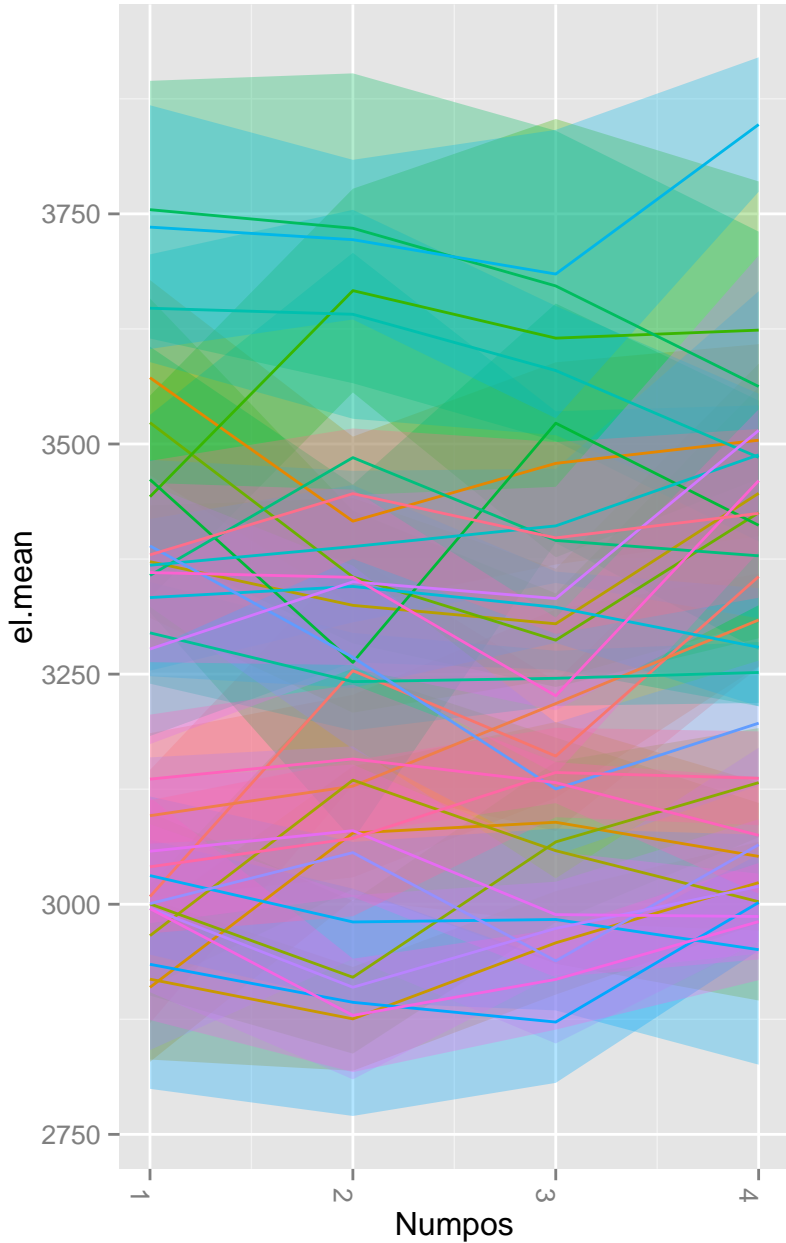

- 2010.Burlison
- 2011.Burlison
- 2012.Burlison
- 2010.Chamberlain
- 2011.Chamberlain
- 2012.Chamberlain
- 2010.Cumberland
- 2011.Cumberland
- 2012.Cumberland
- 2010.LG00-13226
- 2011.LG00-13226
- 2012.LG00-13226
- 2010.LG00-13365
- 2011.LG00-13365
- 2012.LG00-13365
- 2010.LG00-15595
- 2011.LG00-15595
- 2012.LG00-15595
- 2010.LG00-3372
- 2011.LG00-3372
- 2012.LG00-3372
- 2010.LN97-15076
- 2011.LN97-15076
- 2012.LN97-15076
- 2010.Logan
- 2011.Logan
- 2012.Logan
- 2010.Williams 82
- 2011.Williams 82
- 2012.Williams 82

K

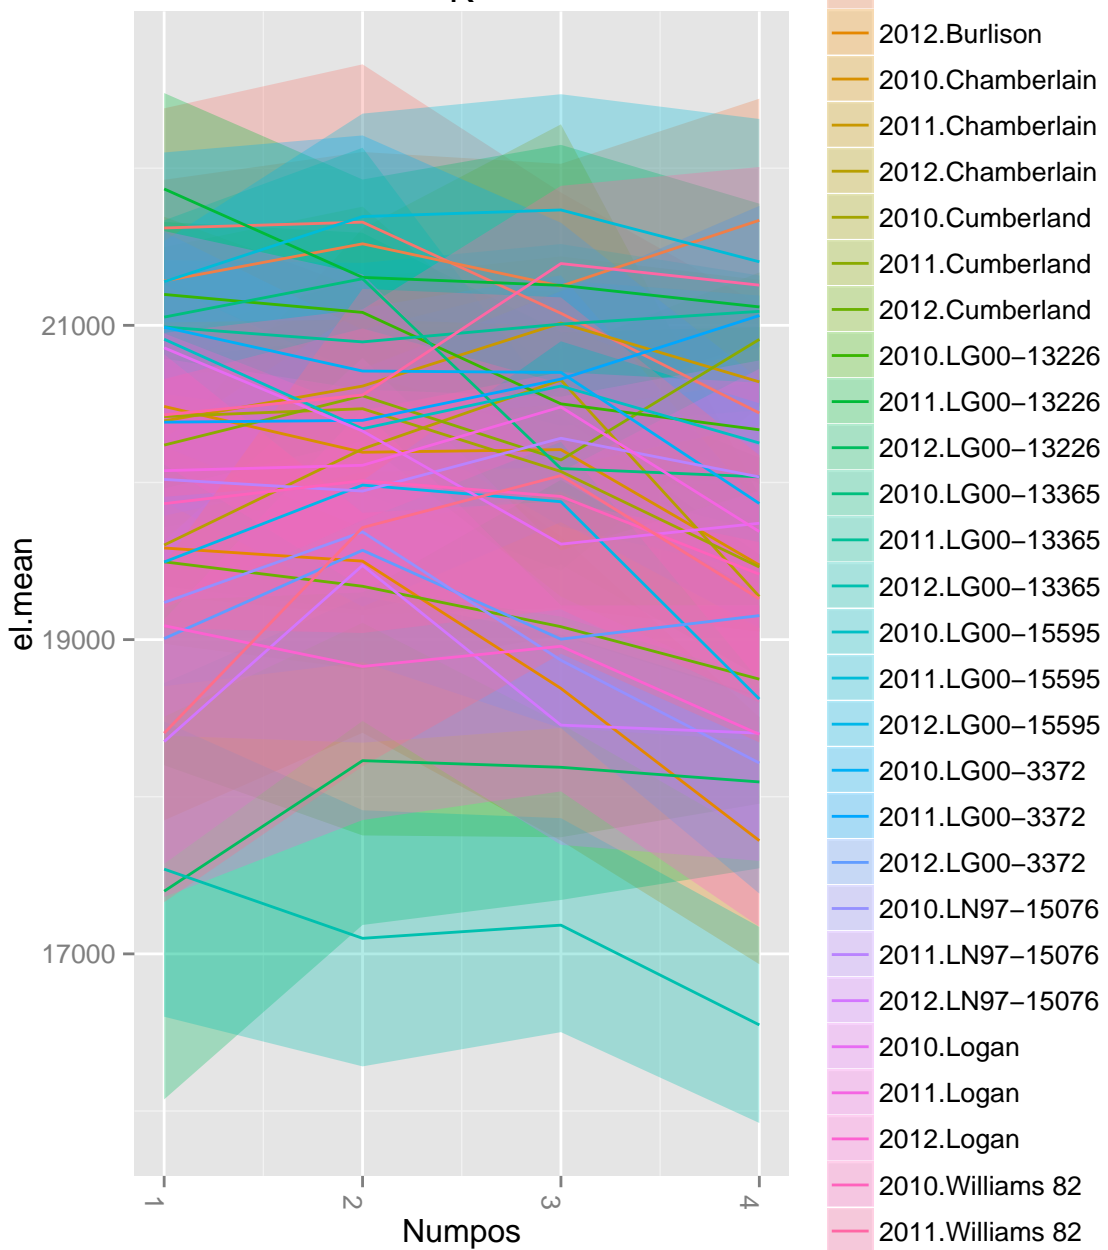

Ca

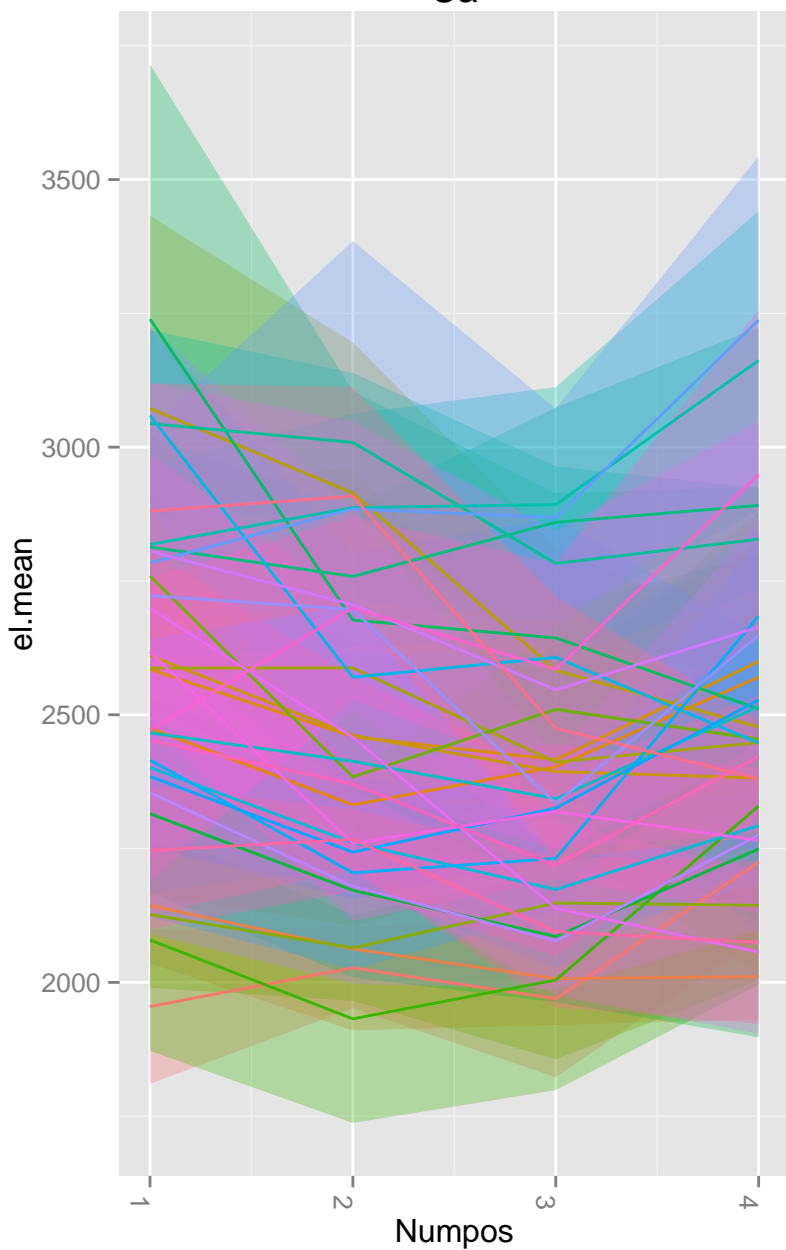

- 2010.Burlison
- 2011.Burlison
- 2012.Burlison
- 2010.Chamberlain
- 2011.Chamberlain
- 2012.Chamberlain
- 2010.Cumberland
- 2011.Cumberland
- 2012.Cumberland
- 2010.LG00-13226
- 2011.LG00-13226
- 2012.LG00-13226
- 2010.LG00-13365
- 2011.LG00-13365
- 2012.LG00-13365
- 2010.LG00-15595
- 2011.LG00-15595
- 2012.LG00-15595
- 2010.LG00-3372
- 2011.LG00-3372
- 2012.LG00-3372
- 2010.LN97-15076
- 2011.LN97-15076
- 2012.LN97-15076
- 2010.Logan
- 2011.Logan
- 2012.Logan
- 2010.Williams 82
- 2011.Williams 82
- 2012.Williams 82

Mn

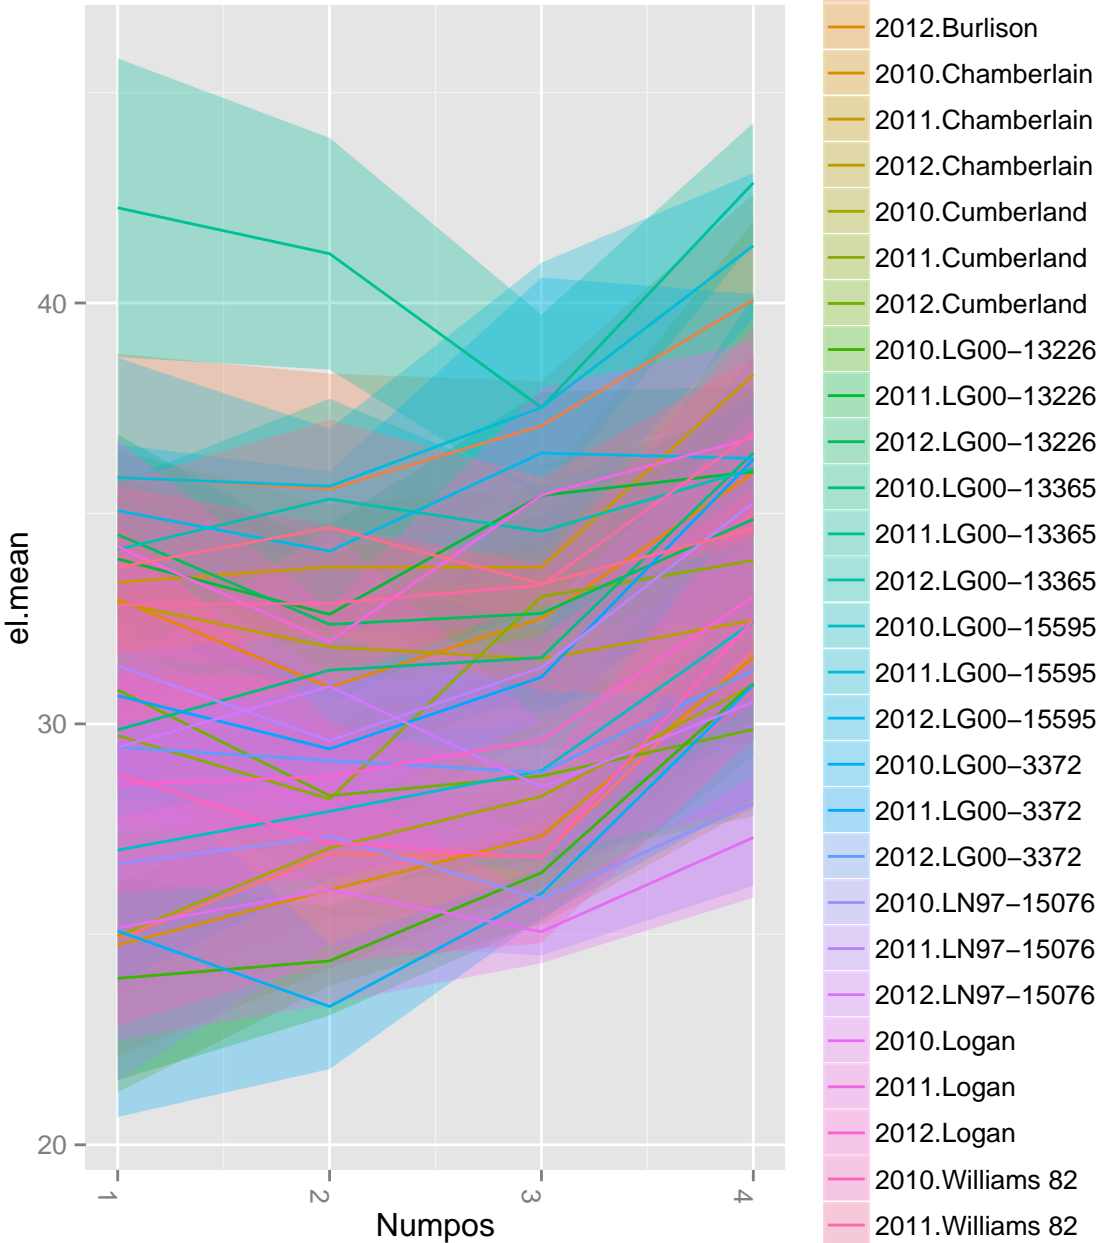



Fe

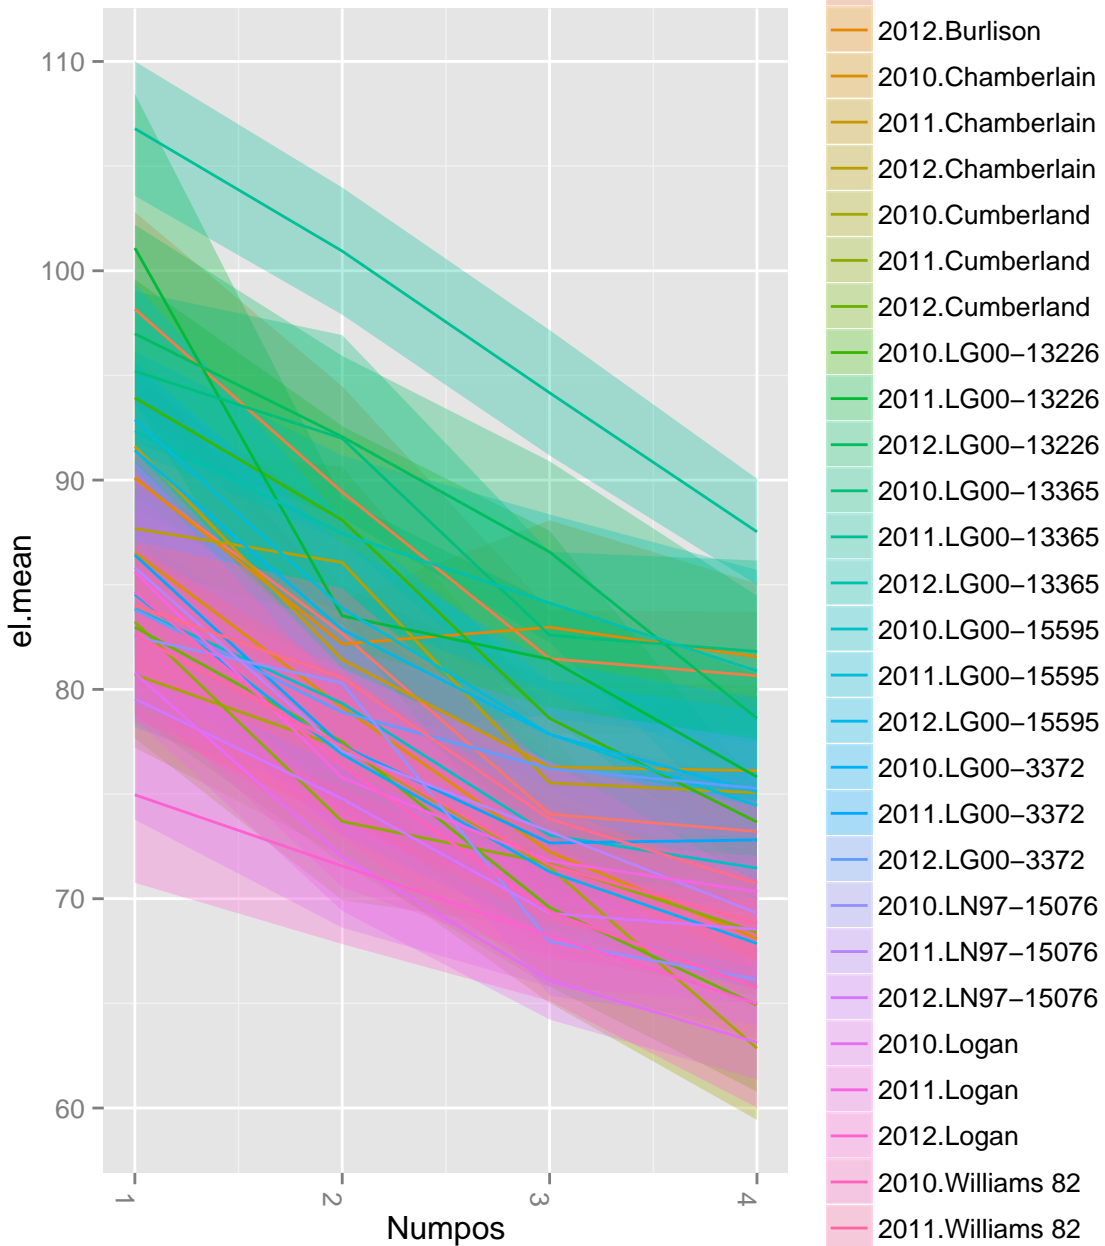

Co

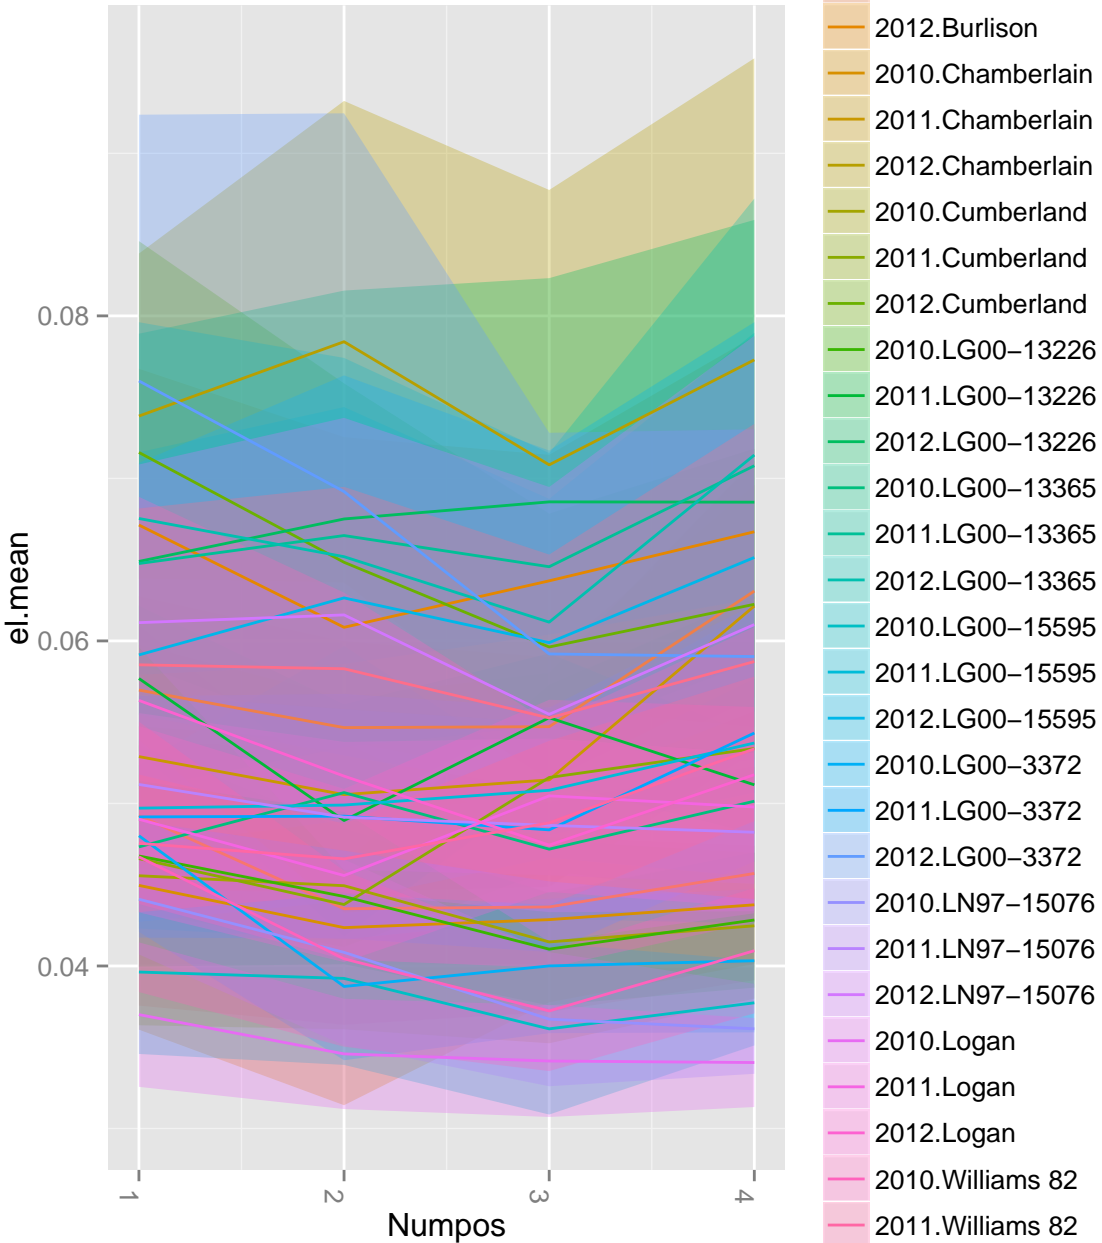

Ni

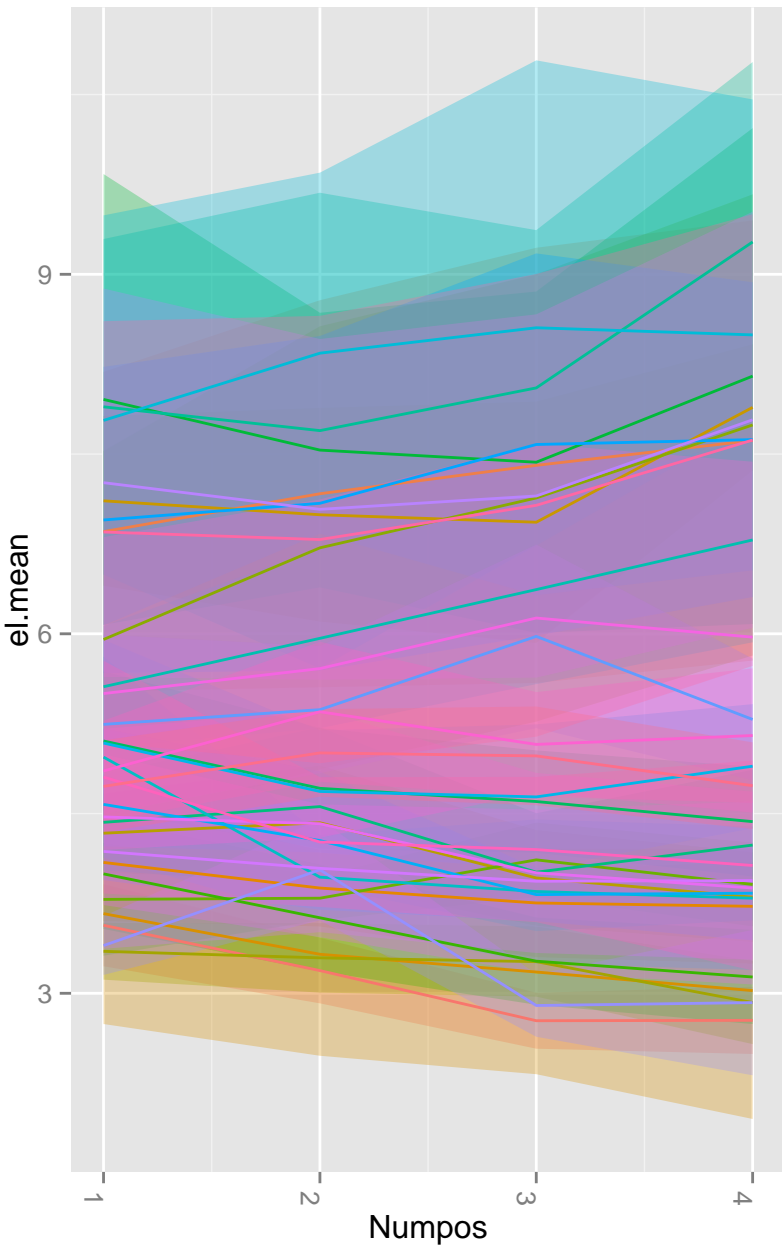

- 2010.Burlison
- 2011.Burlison
- 2012.Burlison
- 2010.Chamberlain
- 2011.Chamberlain
- 2012.Chamberlain
- 2010.Cumberland
- 2011.Cumberland
- 2012.Cumberland
- 2010.LG00-13226
- 2011.LG00-13226
- 2012.LG00-13226
- 2010.LG00-13365
- 2011.LG00-13365
- 2012.LG00-13365
- 2010.LG00-15595
- 2011.LG00-15595
- 2012.LG00-15595
- 2010.LG00-3372
- 2011.LG00-3372
- 2012.LG00-3372
- 2010.LN97-15076
- 2011.LN97-15076
- 2012.LN97-15076
- 2010.Logan
- 2011.Logan
- 2012.Logan
- 2010.Williams 82
- 2011.Williams 82
- 2012.Williams 82

Cu

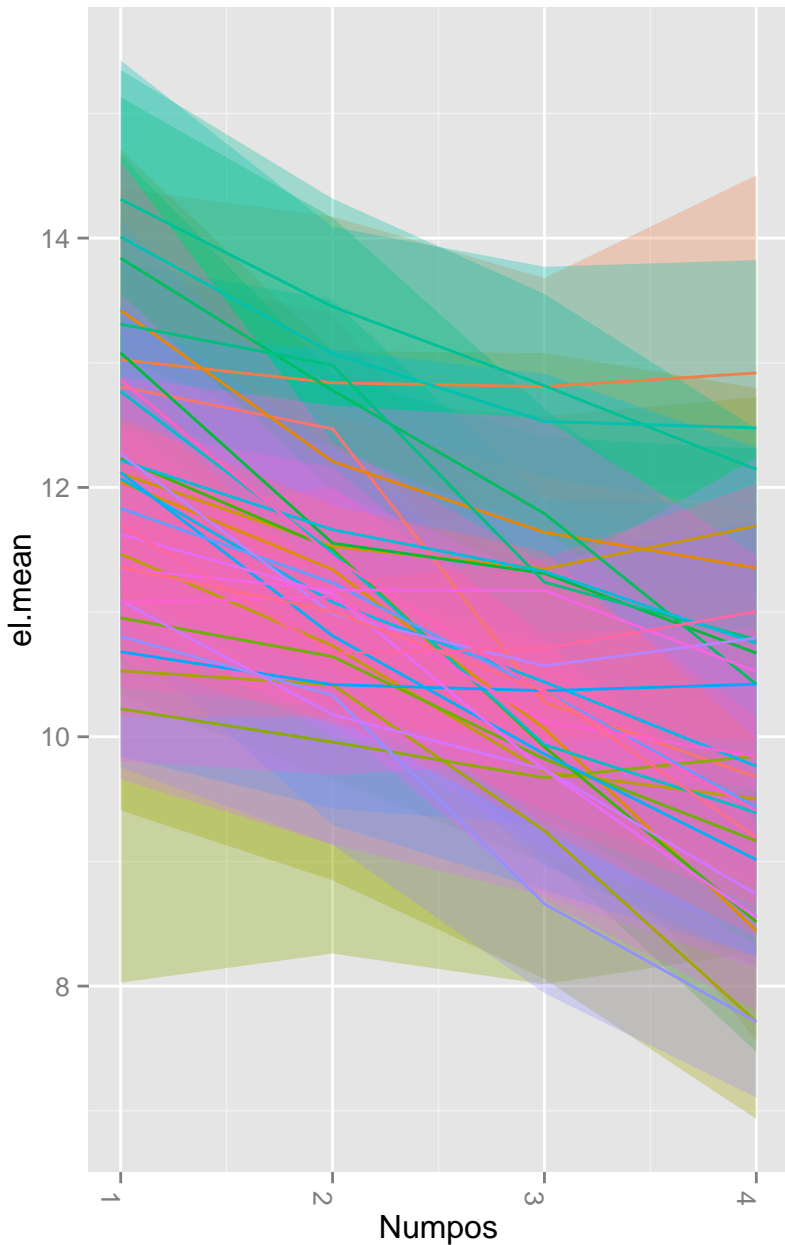

- 2010.Burlison
- 2011.Burlison
- 2012.Burlison
- 2010.Chamberlain
- 2011.Chamberlain
- 2012.Chamberlain
- 2010.Cumberland
- 2011.Cumberland
- 2012.Cumberland
- 2010.LG00-13226
- 2011.LG00-13226
- 2012.LG00-13226
- 2010.LG00-13365
- 2011.LG00-13365
- 2012.LG00-13365
- 2010.LG00-15595
- 2011.LG00-15595
- 2012.LG00-15595
- 2010.LG00-3372
- 2011.LG00-3372
- 2012.LG00-3372
- 2010.LN97-15076
- 2011.LN97-15076
- 2012.LN97-15076
- 2010.Logan
- 2011.Logan
- 2012.Logan
- 2010.Williams 82
- 2011.Williams 82
- 2012.Williams 82
