# Supplementary material for: Canopy position has a profound effect on soybean seed composition
Source: PubMed Central journal article supplement (PMC5028787; doi:10.7717/peerj.2452), 2016-09-13

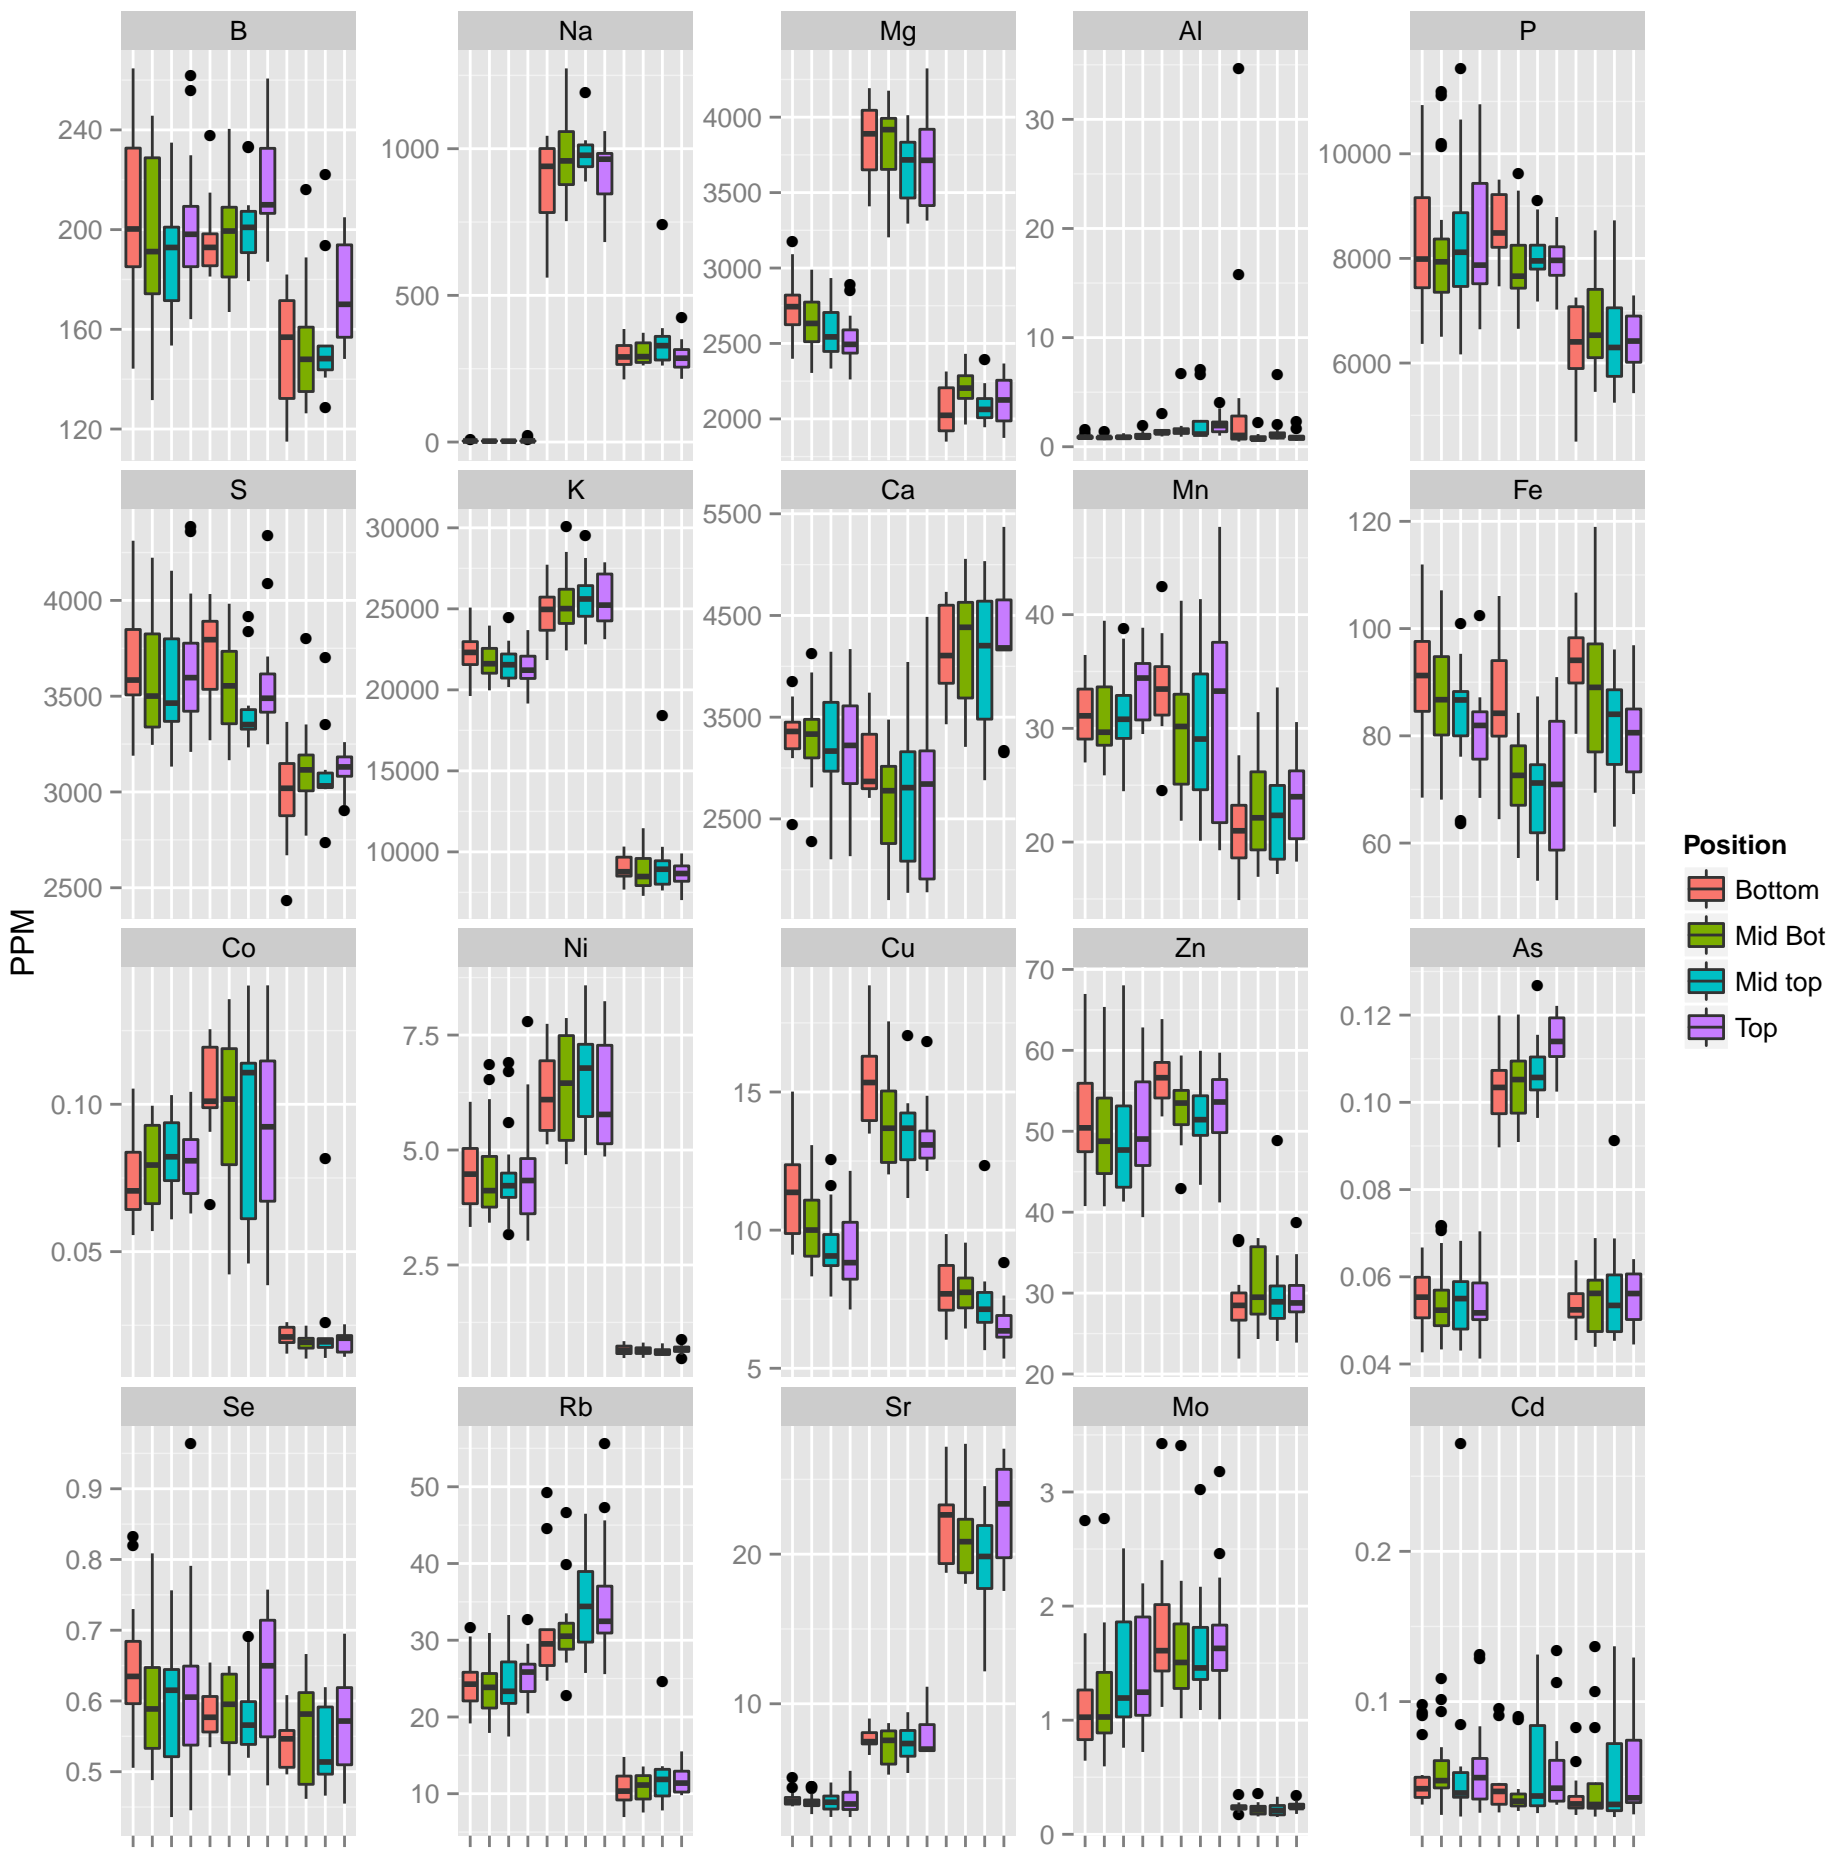

Supplement: peerj-04-2452-s006.pdf [file peerj-04-2452-s006.pdf]
