# Supplementary material for: Canopy position has a profound effect on soybean seed composition
Source: PubMed Central journal article supplement (PMC5028787; doi:10.7717/peerj.2452), 2016-09-13

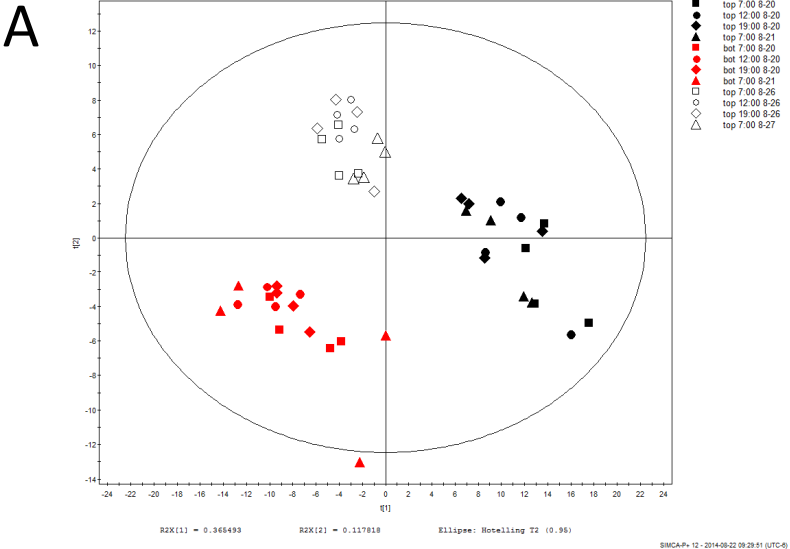

Autoscale and log transformation for A) and B) row normalization for C).

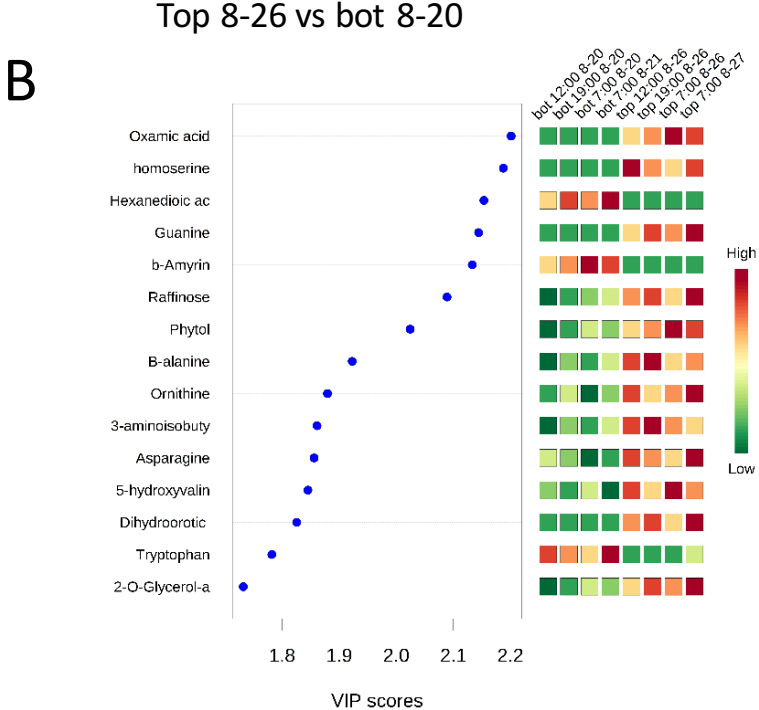

Supplement: peerj-04-2452-s008.pdf [file peerj-04-2452-s008.pdf]
